# Supplementary material for: A concise and fully selective synthesis of the ant venom alkaloid (3S,5R,8S,9S)-3-butyl-5-propyl-8-hydroxyindolizidine
Source: Royal Society of Chemistry journal article supplement (doi:10.1039/b912190k), 2009-01-01
Supplement: b912190k.pdf [file b912190k.pdf]

## Supporting Information for

### A Concise and Fully Selective Synthesis of the Ant Venom Alkaloid

#### (3*S*,5*R*,8*S*,9*S*)-3-Butyl-5-propyl-8-hydroxyindolizidine

Geng-Jie Lin,<sup>a</sup> Pei-Qiang Huang<sup>\*a,b</sup>

<sup>a</sup> Department of Chemistry and Key Laboratory for Chemical Biology of Fujian Province, College of Chemistry and Chemical Engineering, Xiamen University, Xiamen, Fujian 361005, P. R. China; <sup>b</sup> State Key Laboratory of Bioorganic and Natural Products Chemistry, 354 Fenglin Lu, Shanghai 200032, P. R. China

E-mail: (pqhuang@xmu.edu.cn)

#### Contents (21 pages):

- <sup>1</sup>H and <sup>13</sup>C NMR spectra of compounds **4~6**, **8~12**, **2** (pp. 2-20).
- Variable-temperature NMR studies on compound **6** (pp. 5).
- HSQC spectra of compound **9** (pp. 11).
- Table1. Comparison of the NMR data between our synthetic product **2** and those reported. (pp. 21).

1g71181-CD3CN

2009.7.14

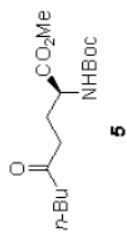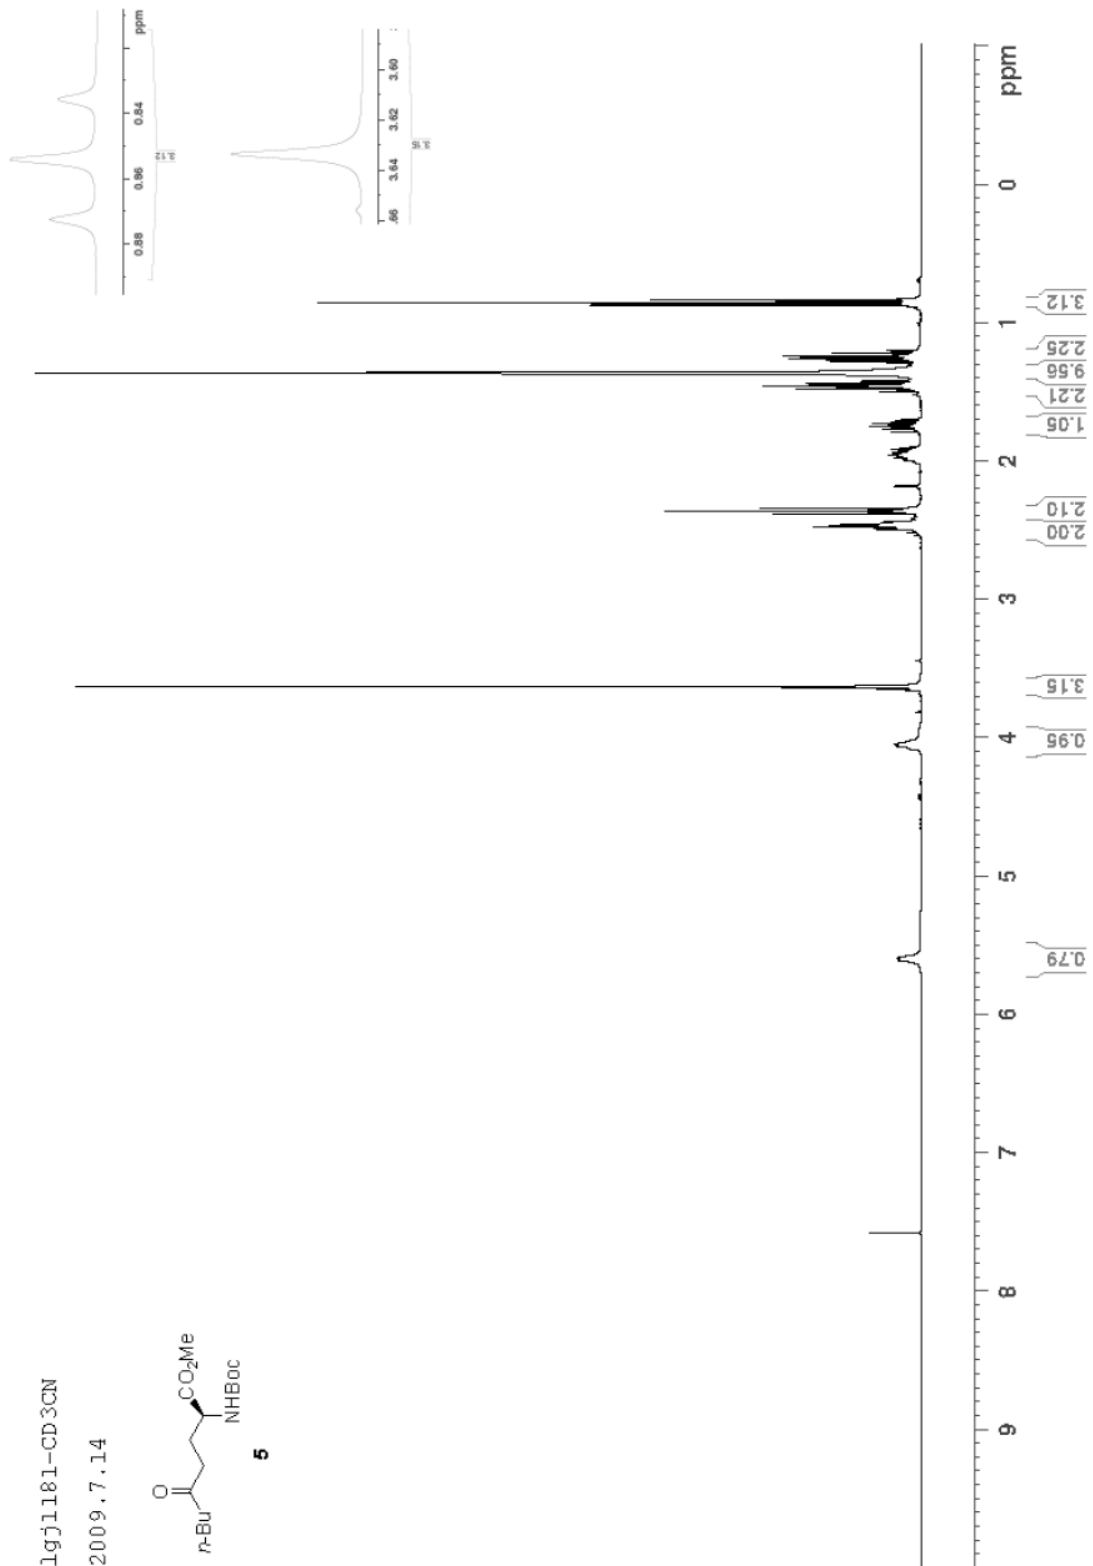

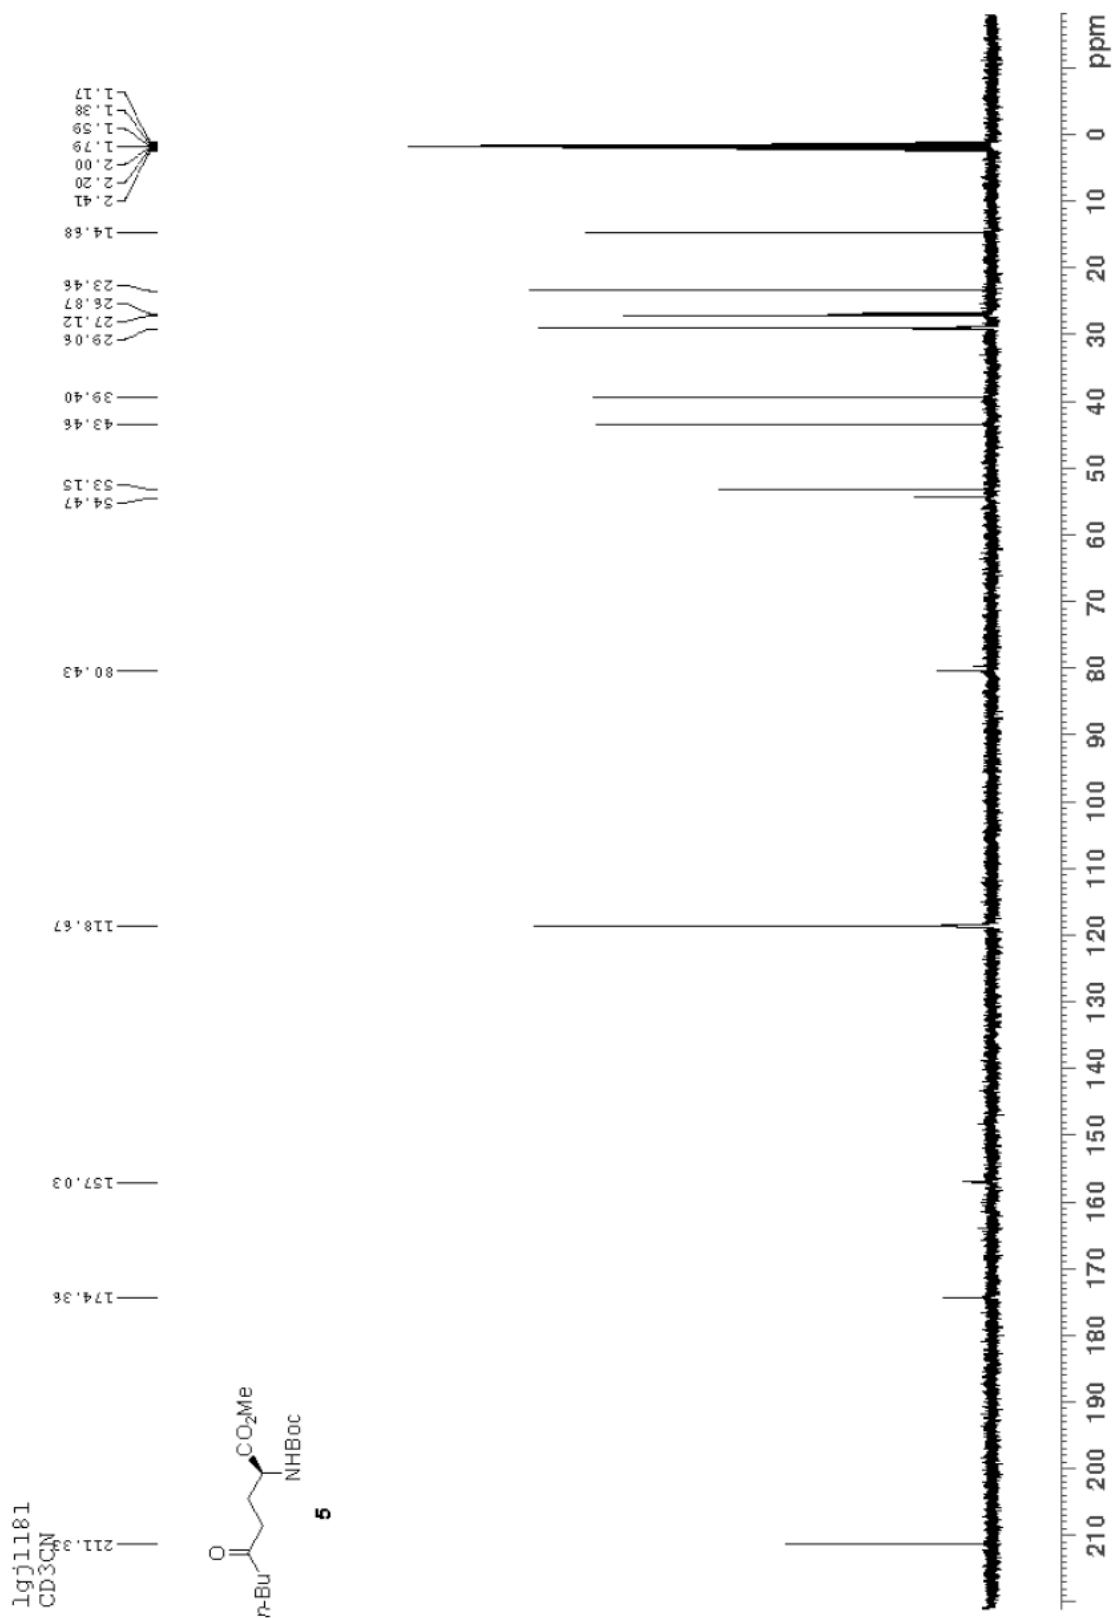

Sample:lgj1183  
Solvent:DMSO-d6  
Spectrum:H1  
temp=343k  
Jul, 17, 2009

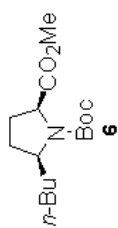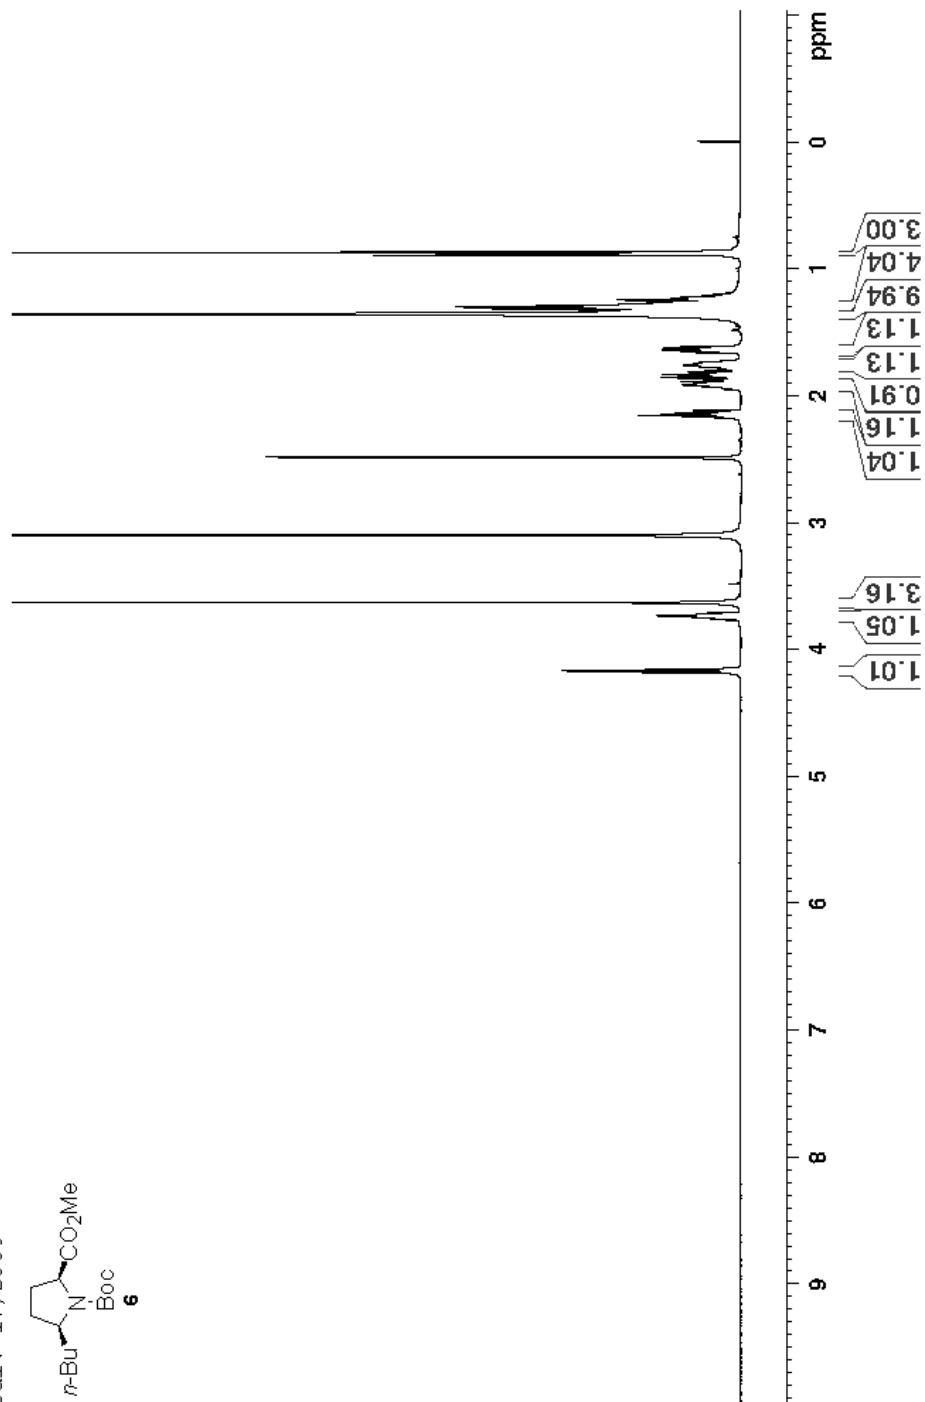

Sample:lgj1183  
Solvent:DMSO-d6  
Spectrum:H1  
temp=300k  
Jul. 17, 2009

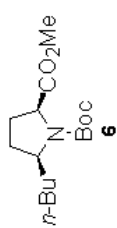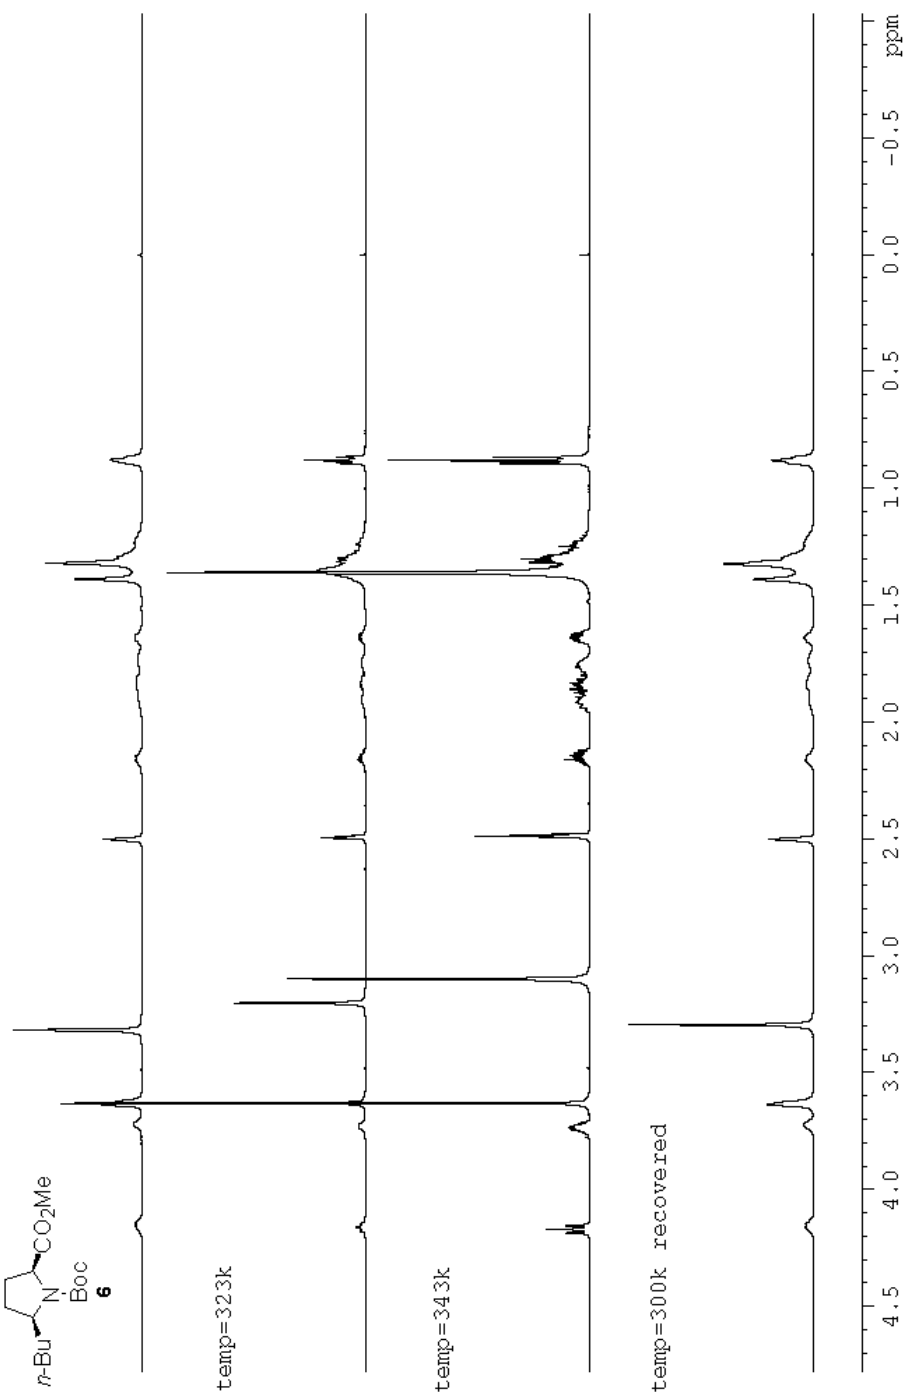

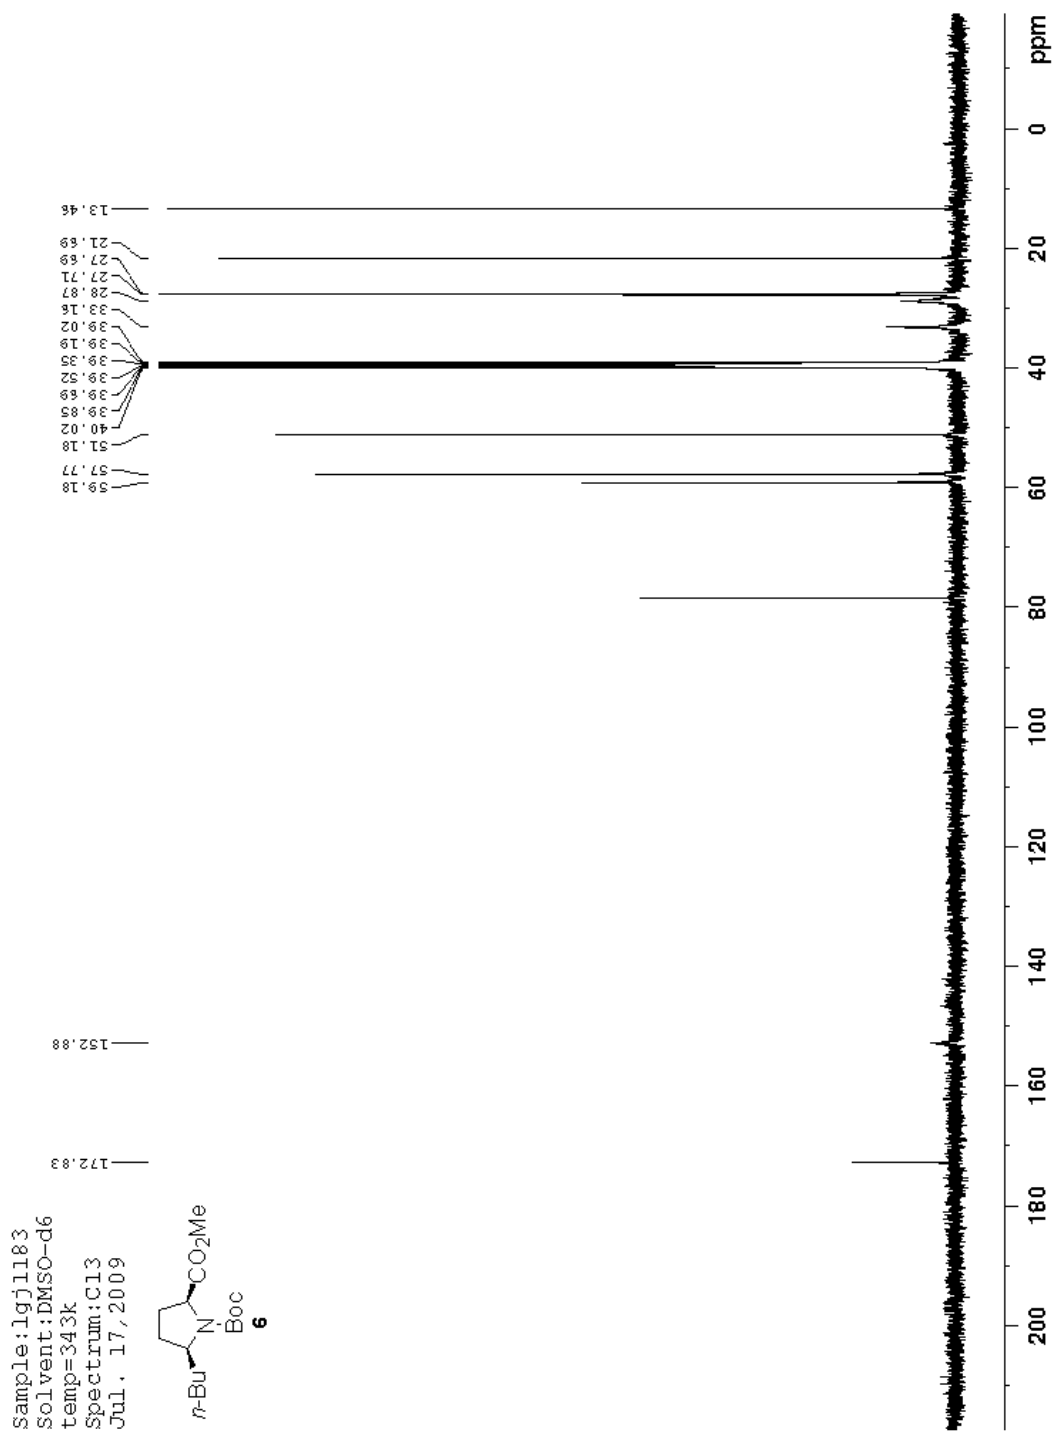

Sample:lgj11183  
Solvent:DMSO-d6  
temp=300k  
Spectrum:C13  
Jul. 17,2009

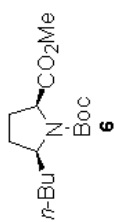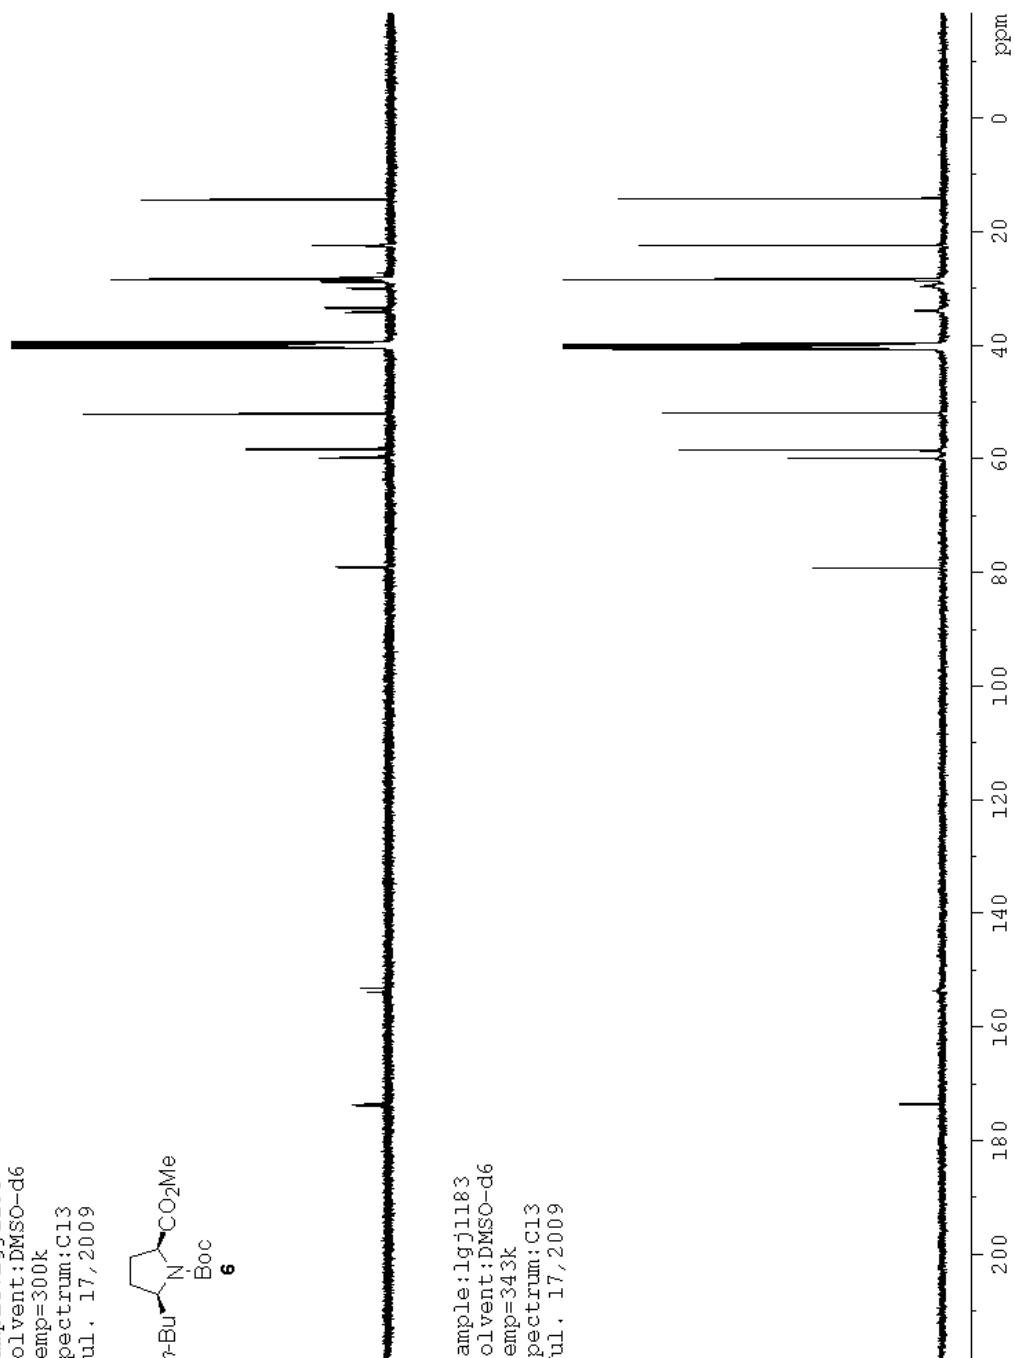

Sample:lgj11183  
Solvent:DMSO-d6  
temp=343k  
Spectrum:C13  
Jul. 17,2009

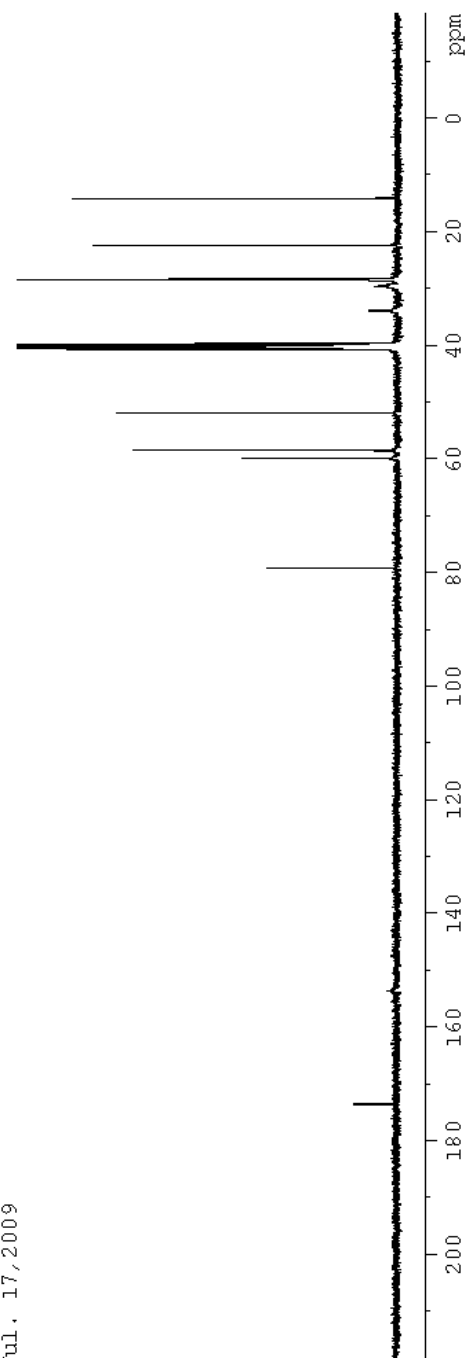

LGJ1237-H1  
CDCl<sub>3</sub>

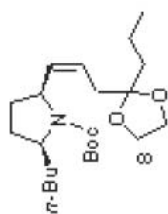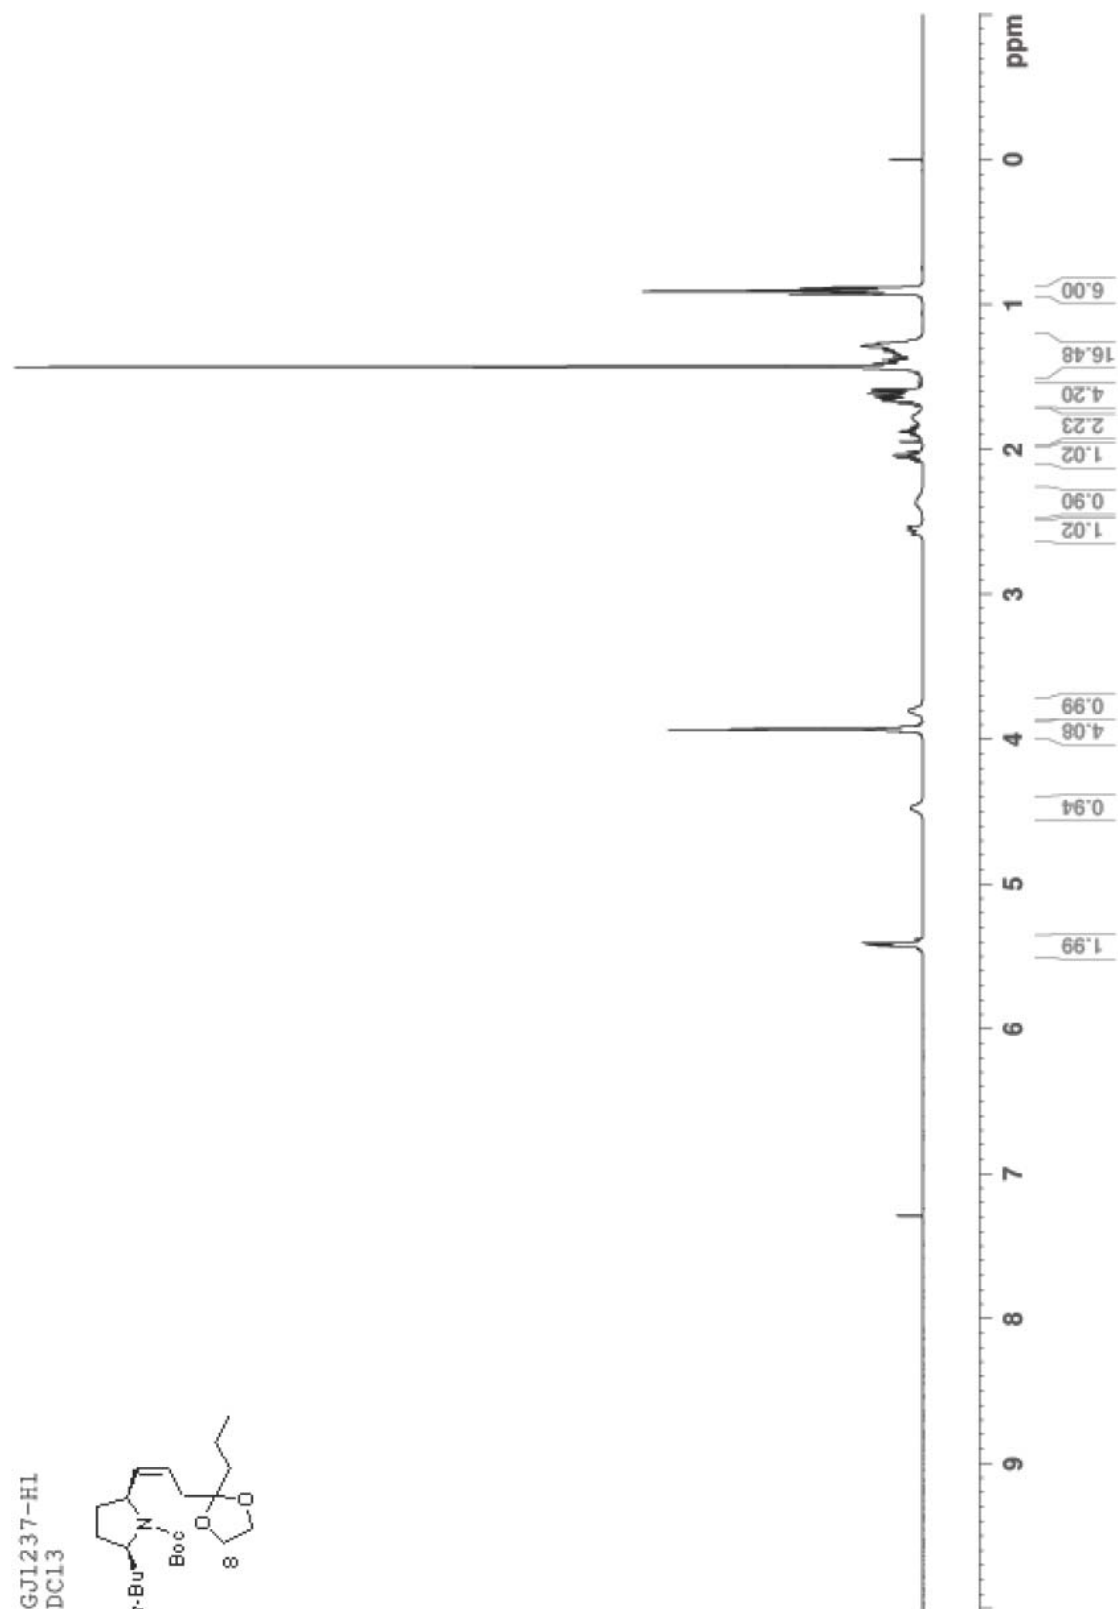



LGJ1237-C13  
CDCl<sub>3</sub>

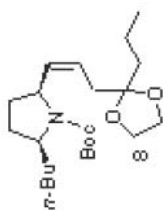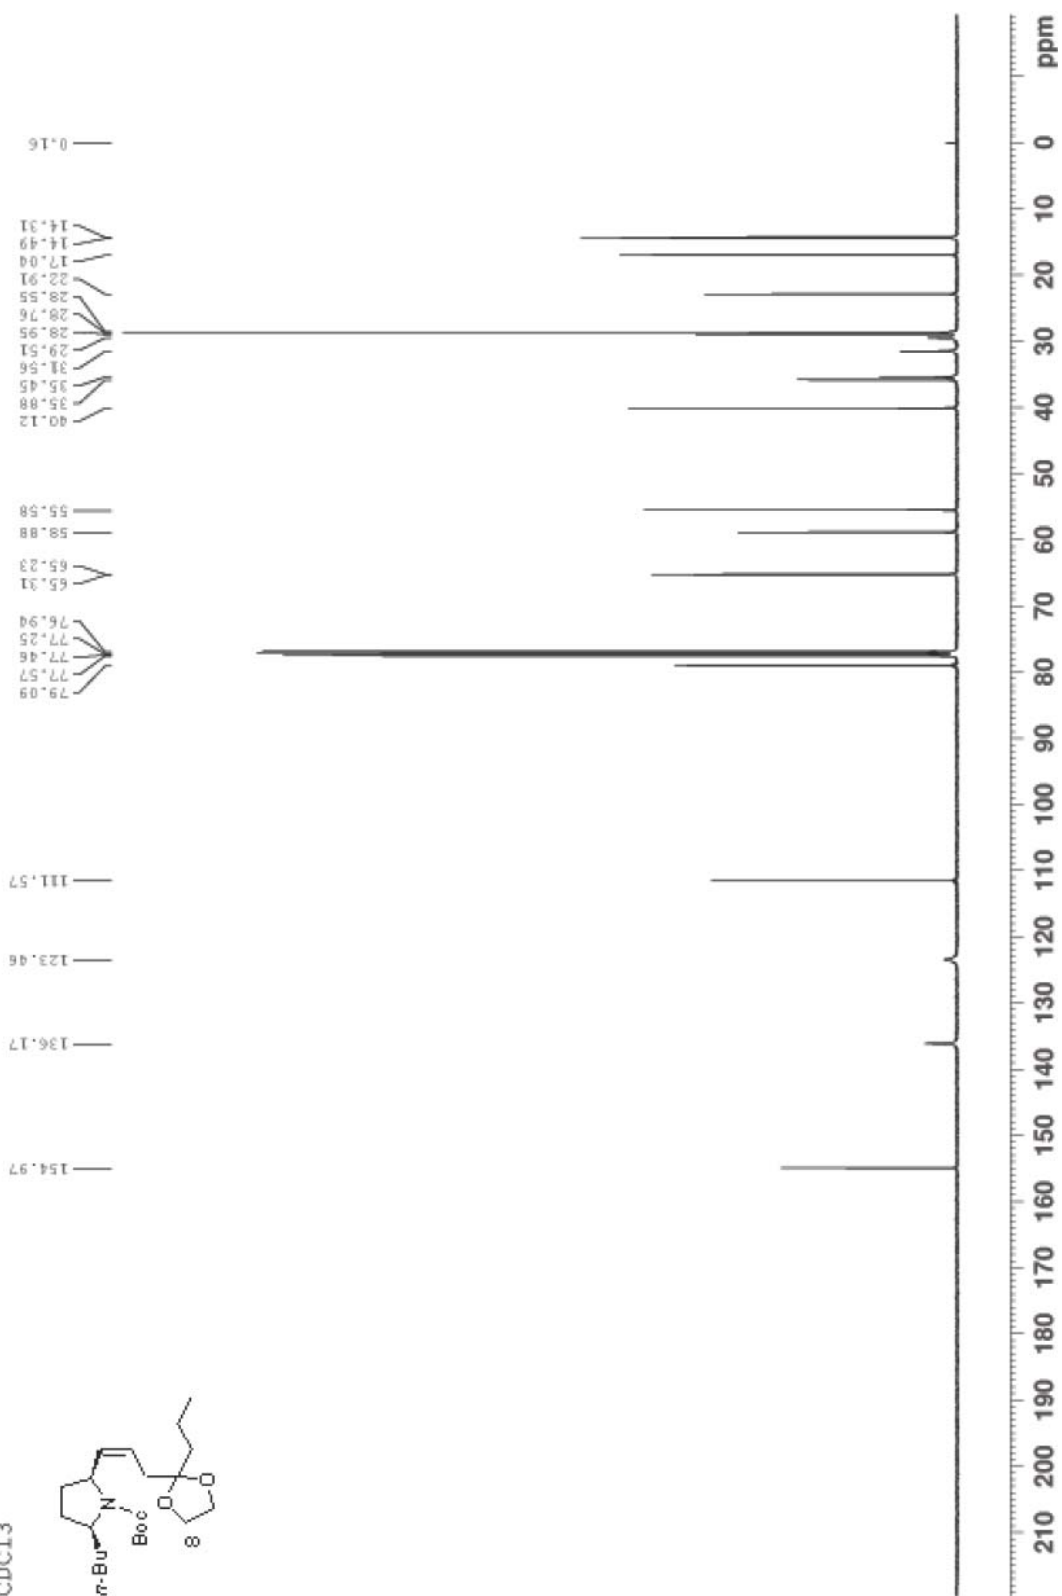

LGJ1210  
CDC13  
2009 3 10

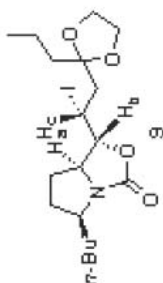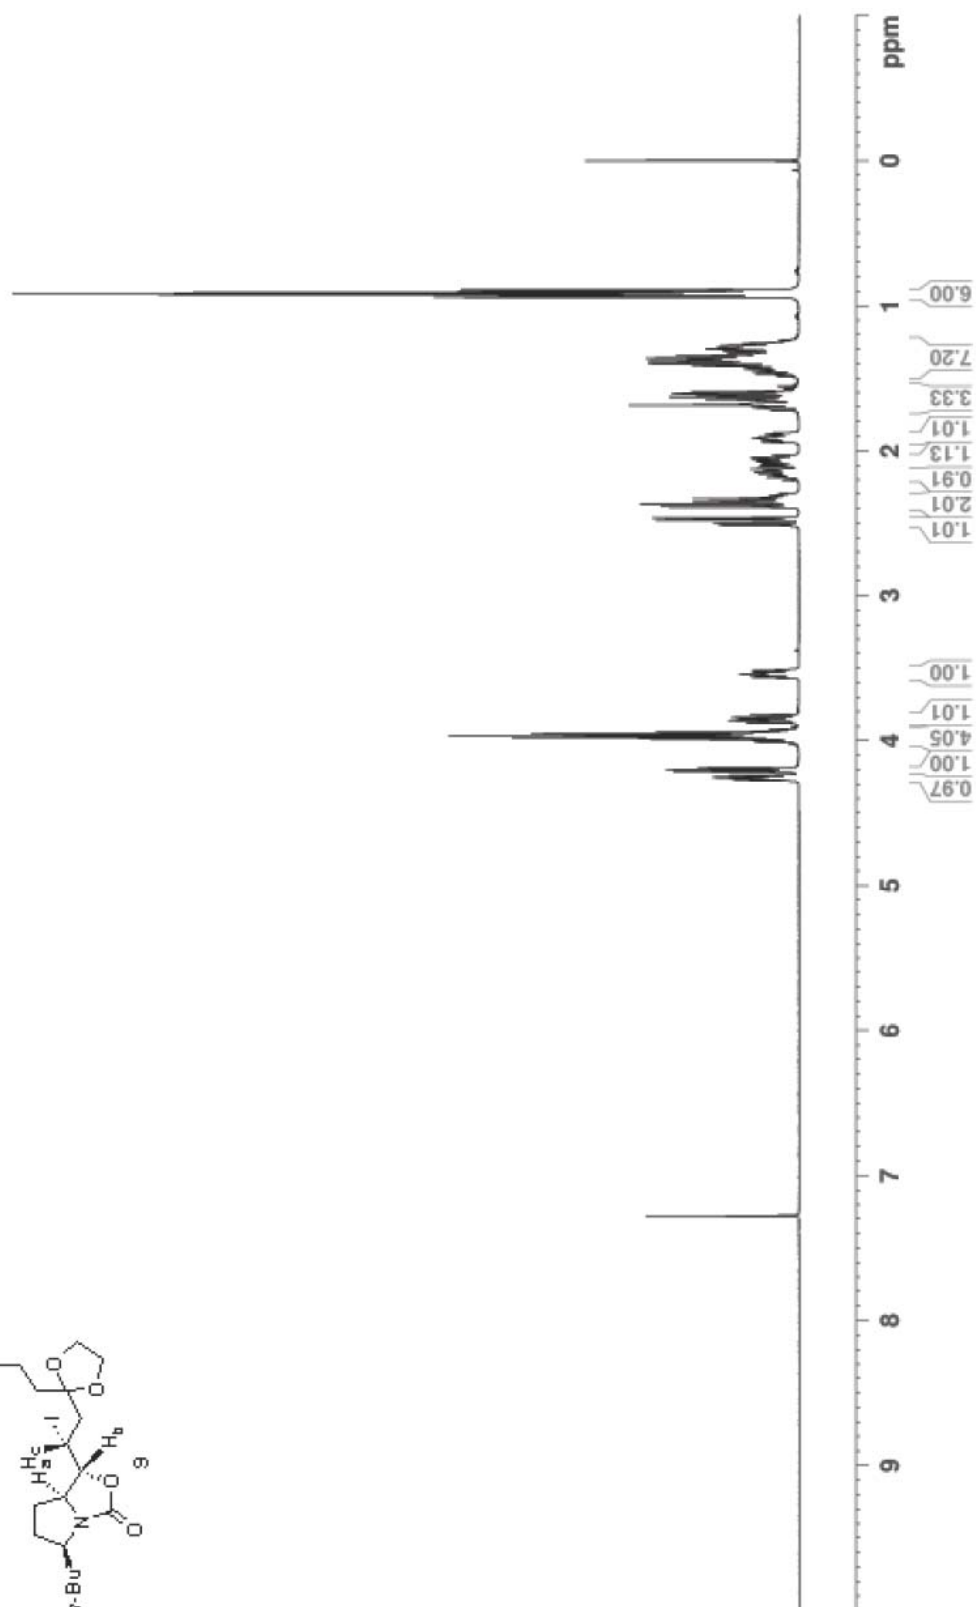

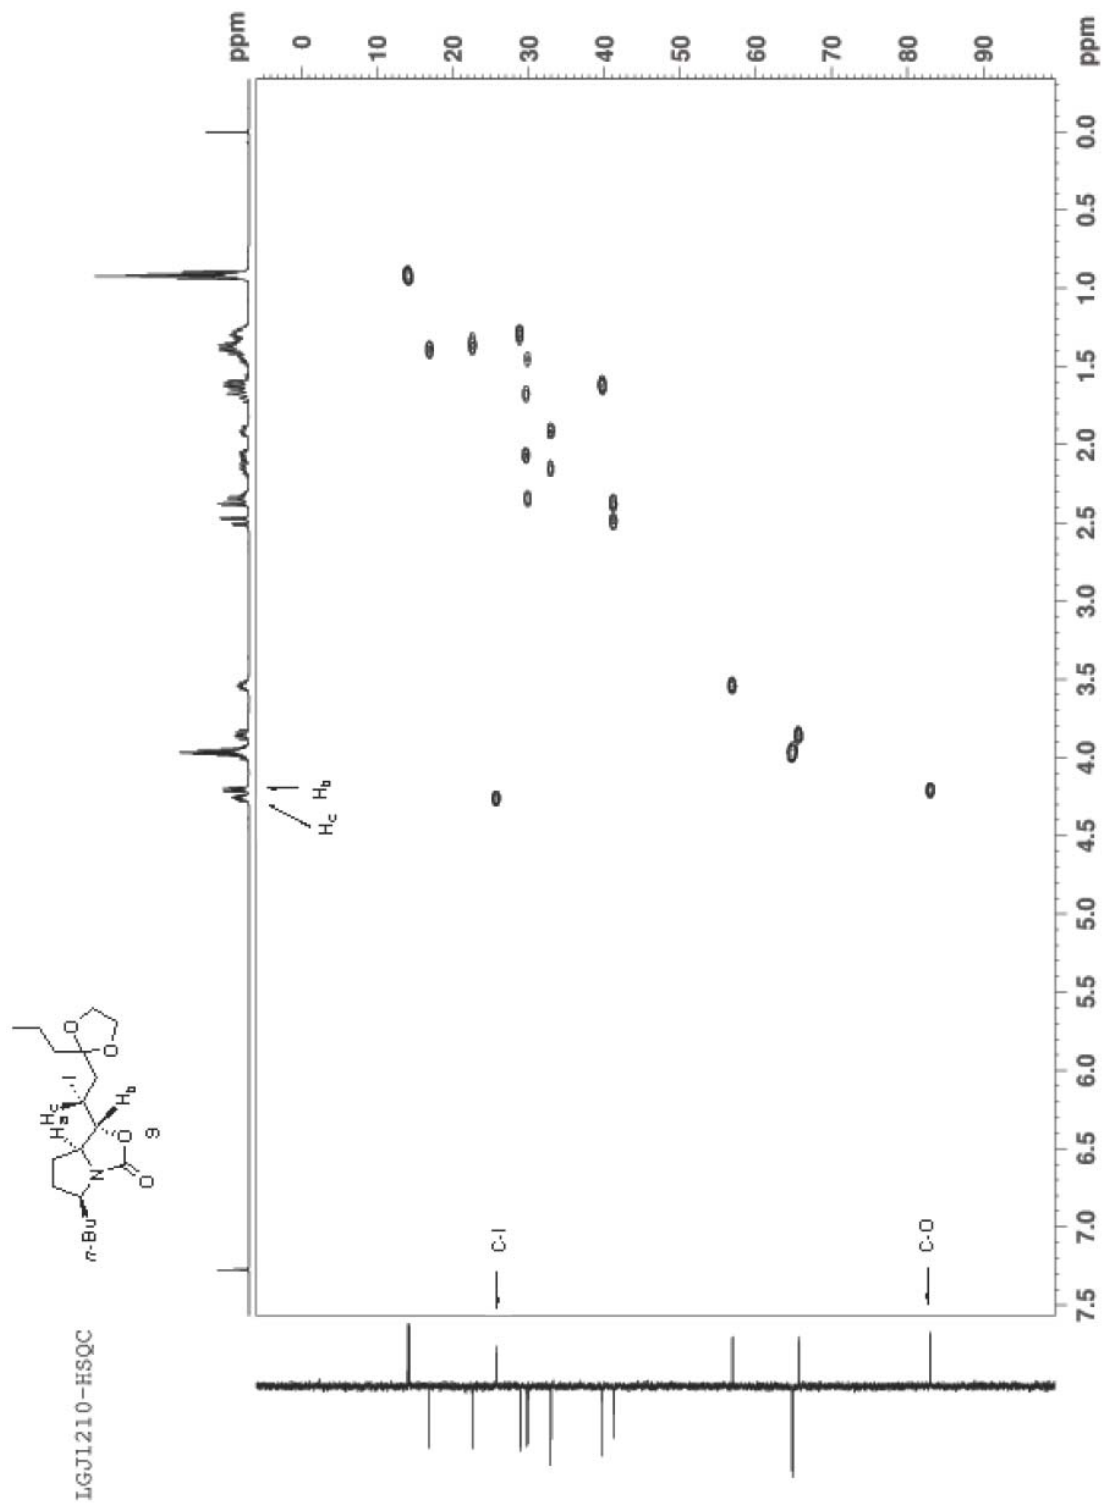

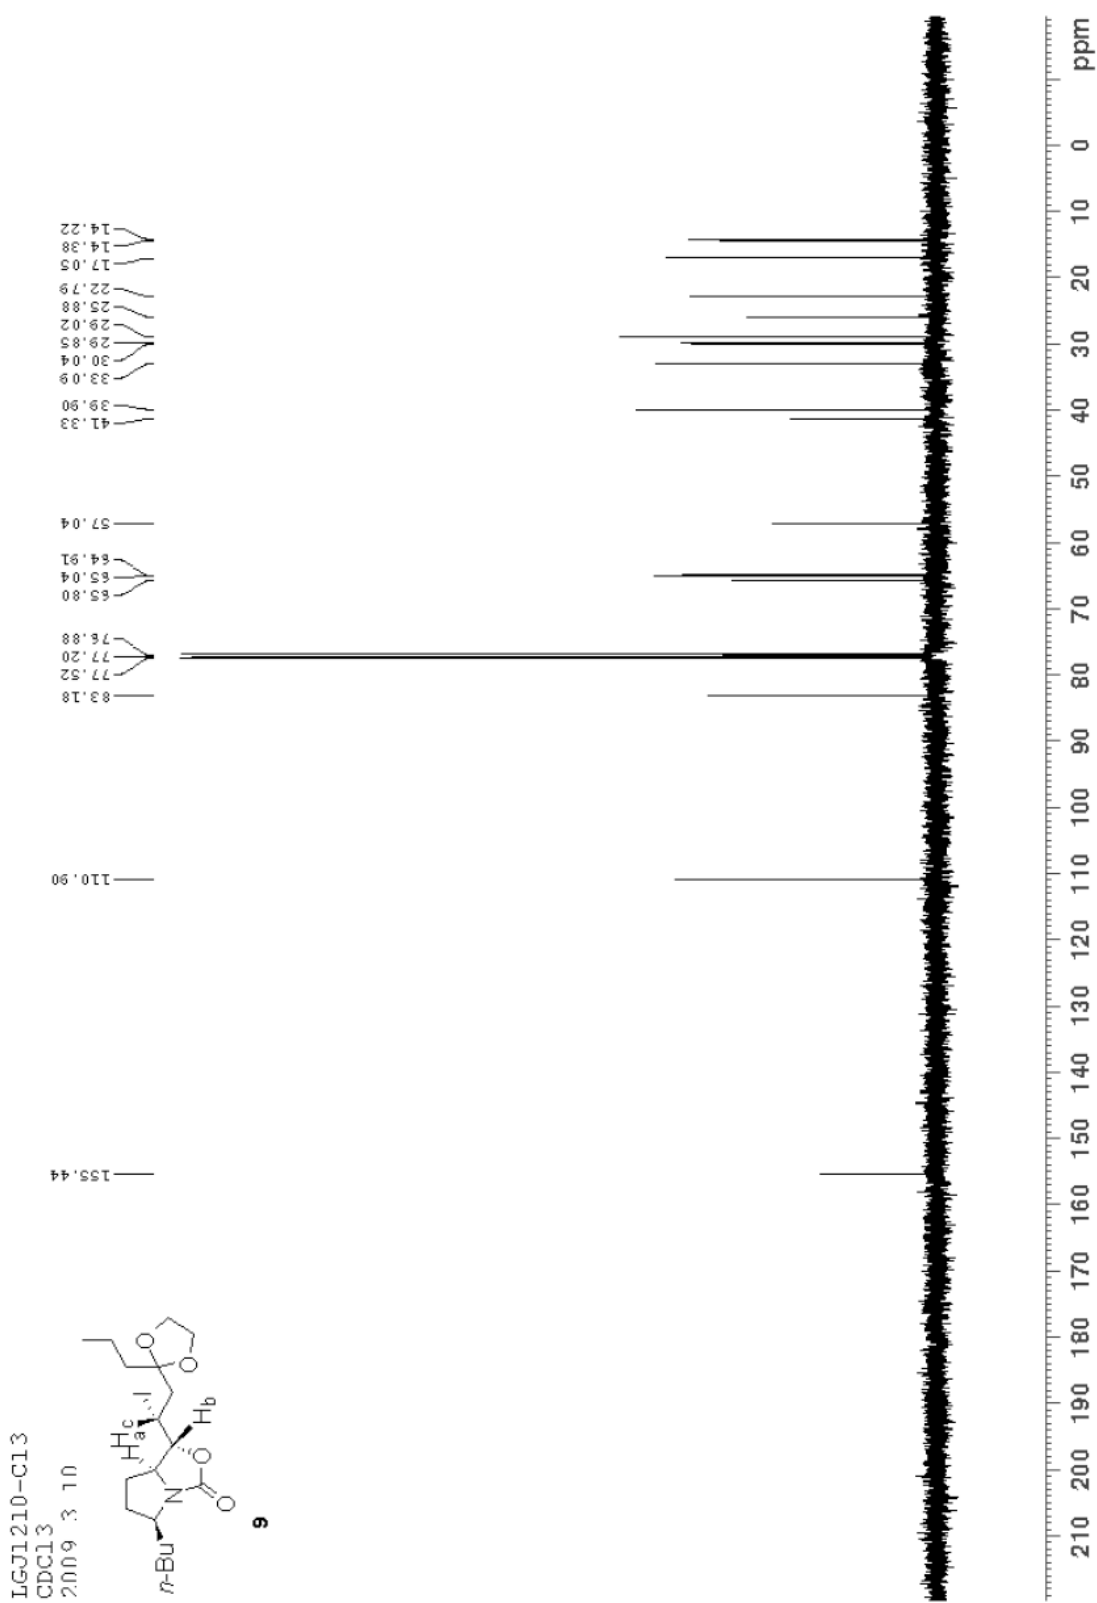

LGJ1211-H1  
CDCl3  
2009 3 10

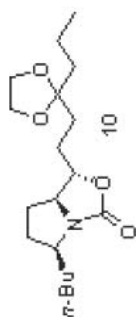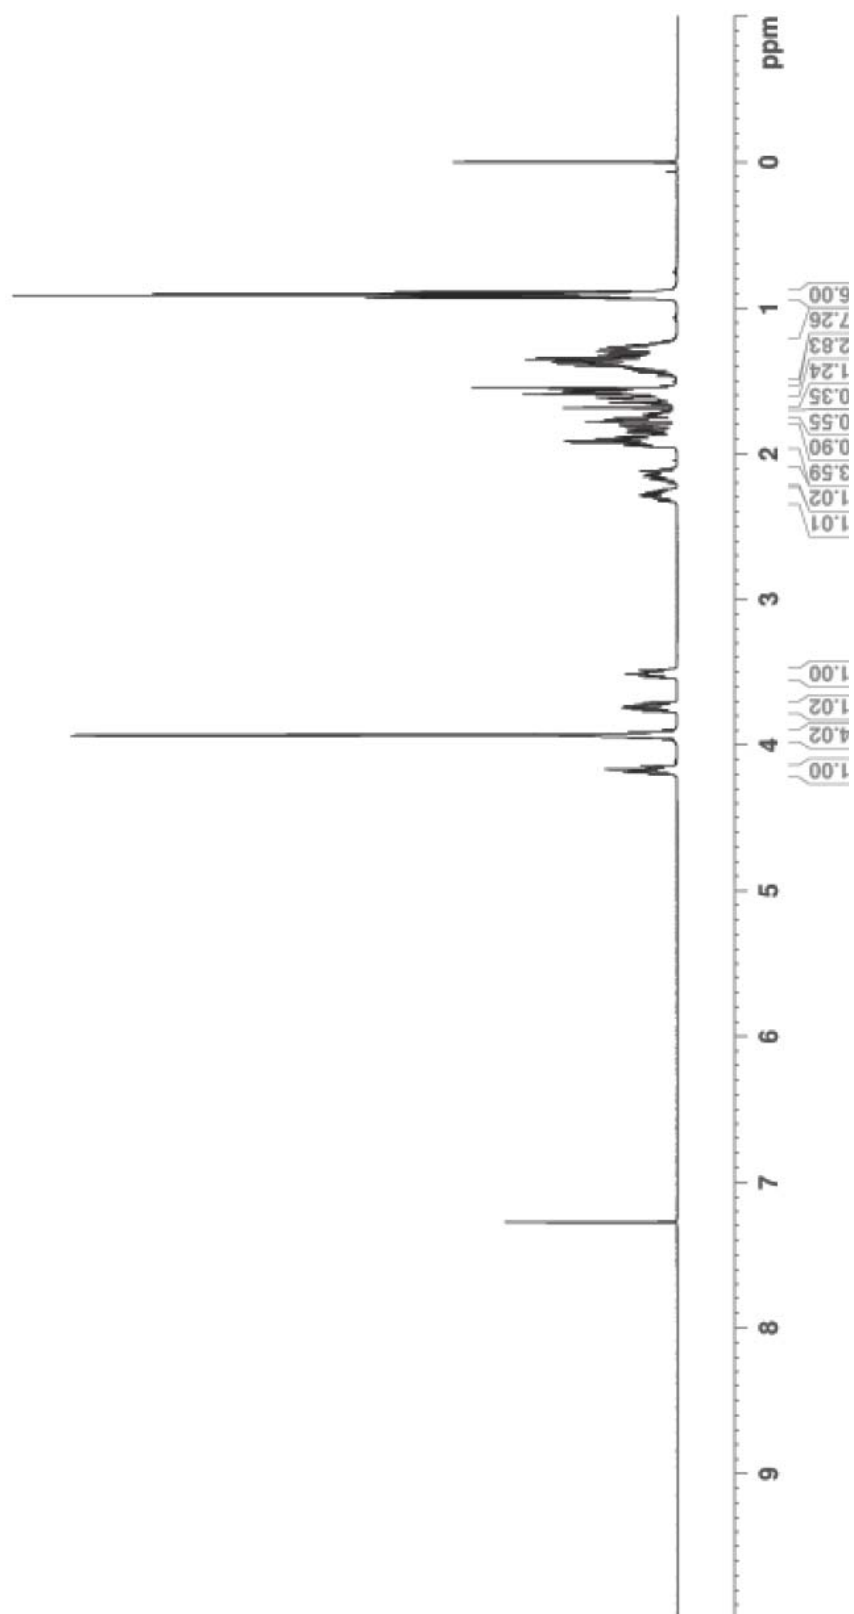

LGJ1211-C13  
CDCl3  
2009 3 10

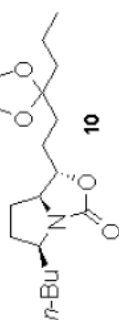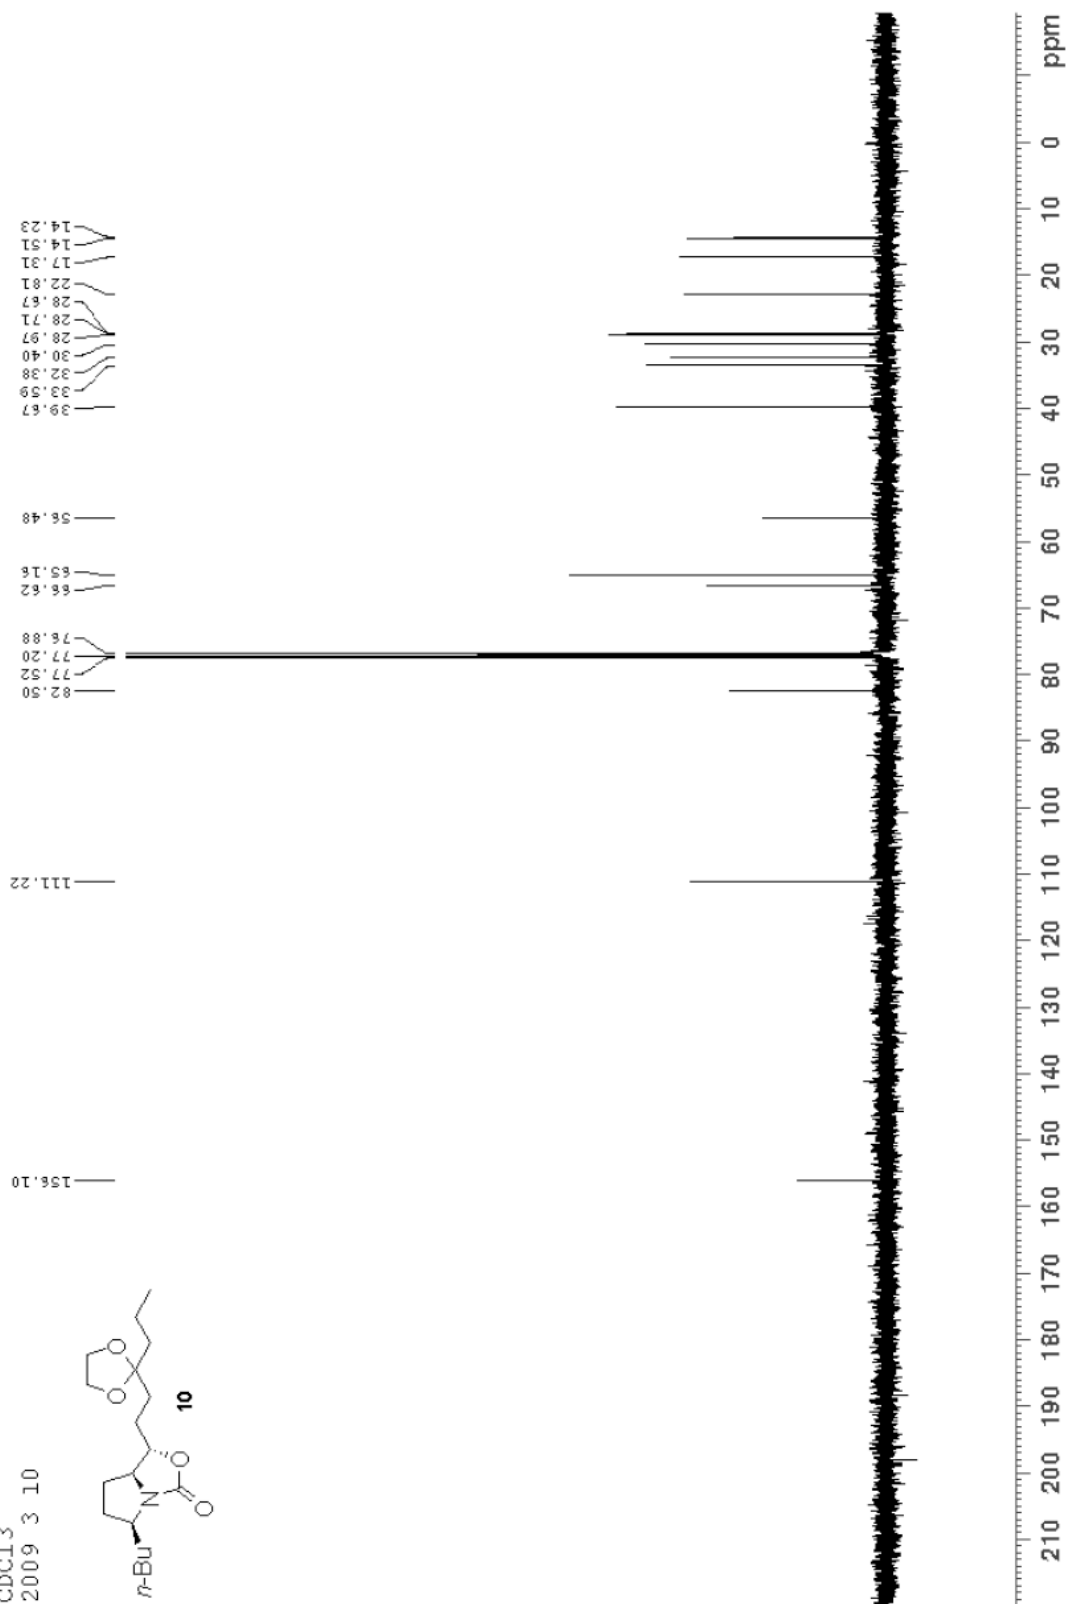

LGJ1212-H1  
CDC13  
2009 3 10

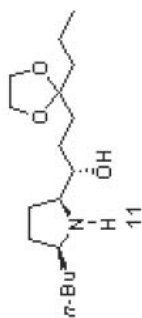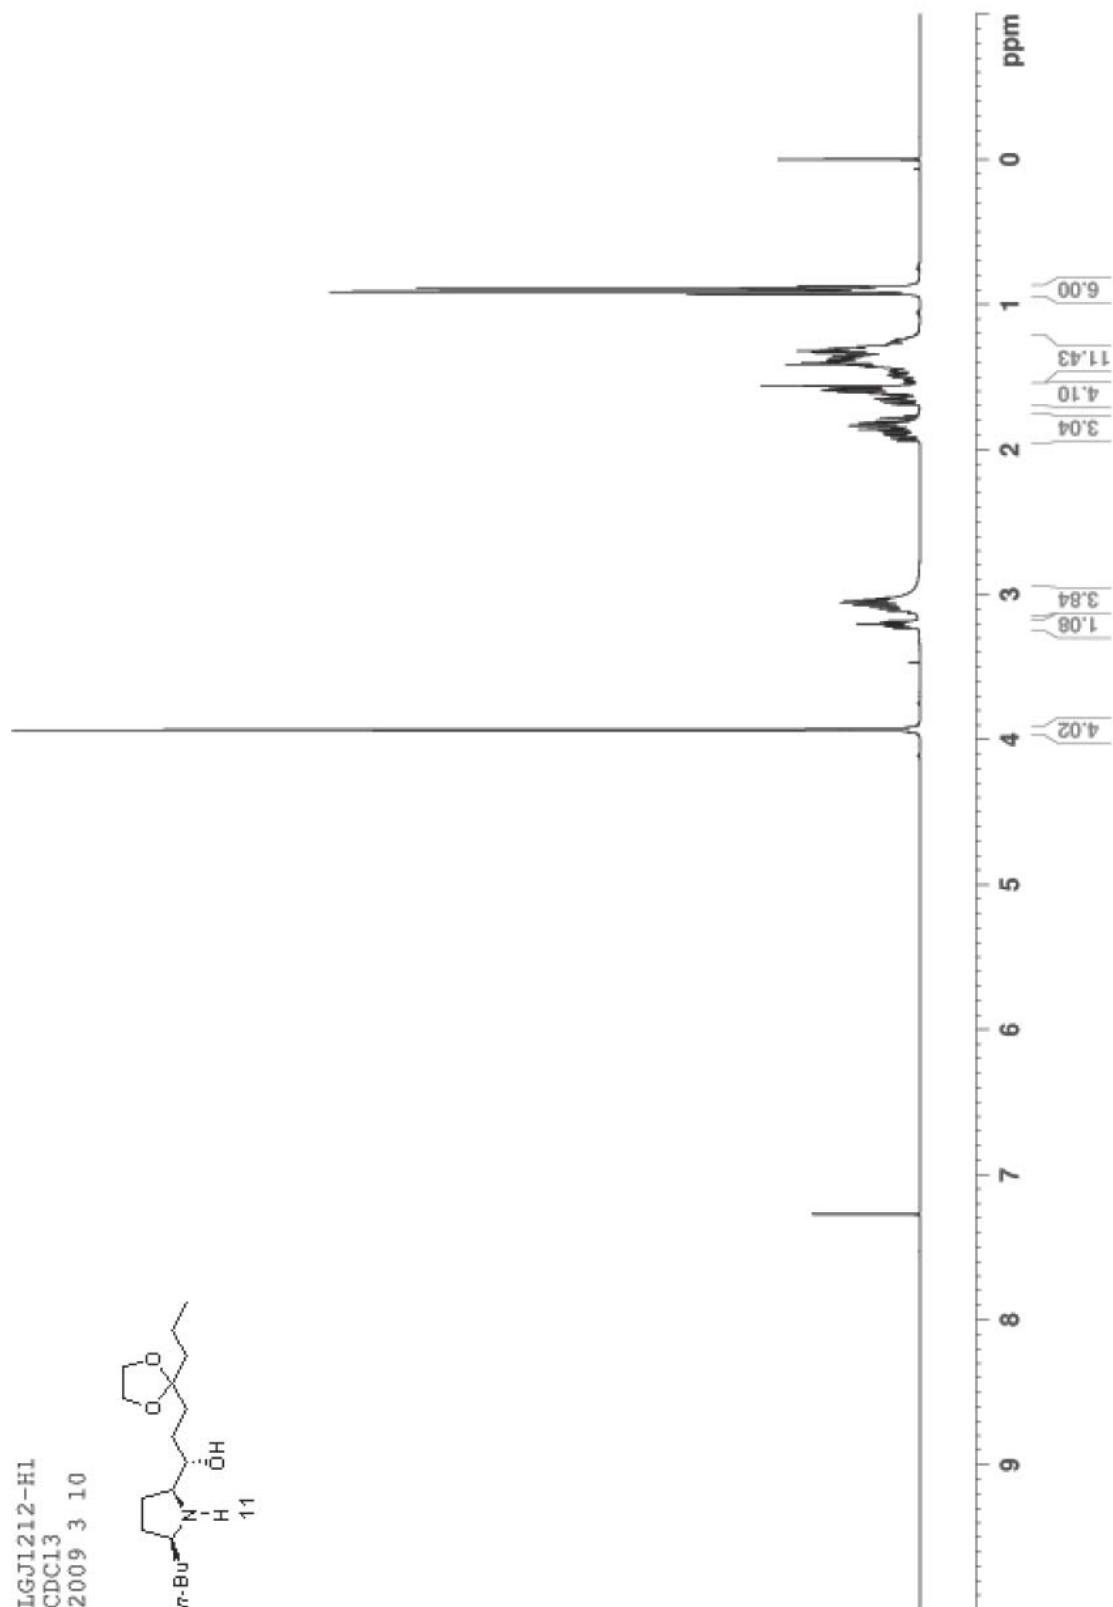

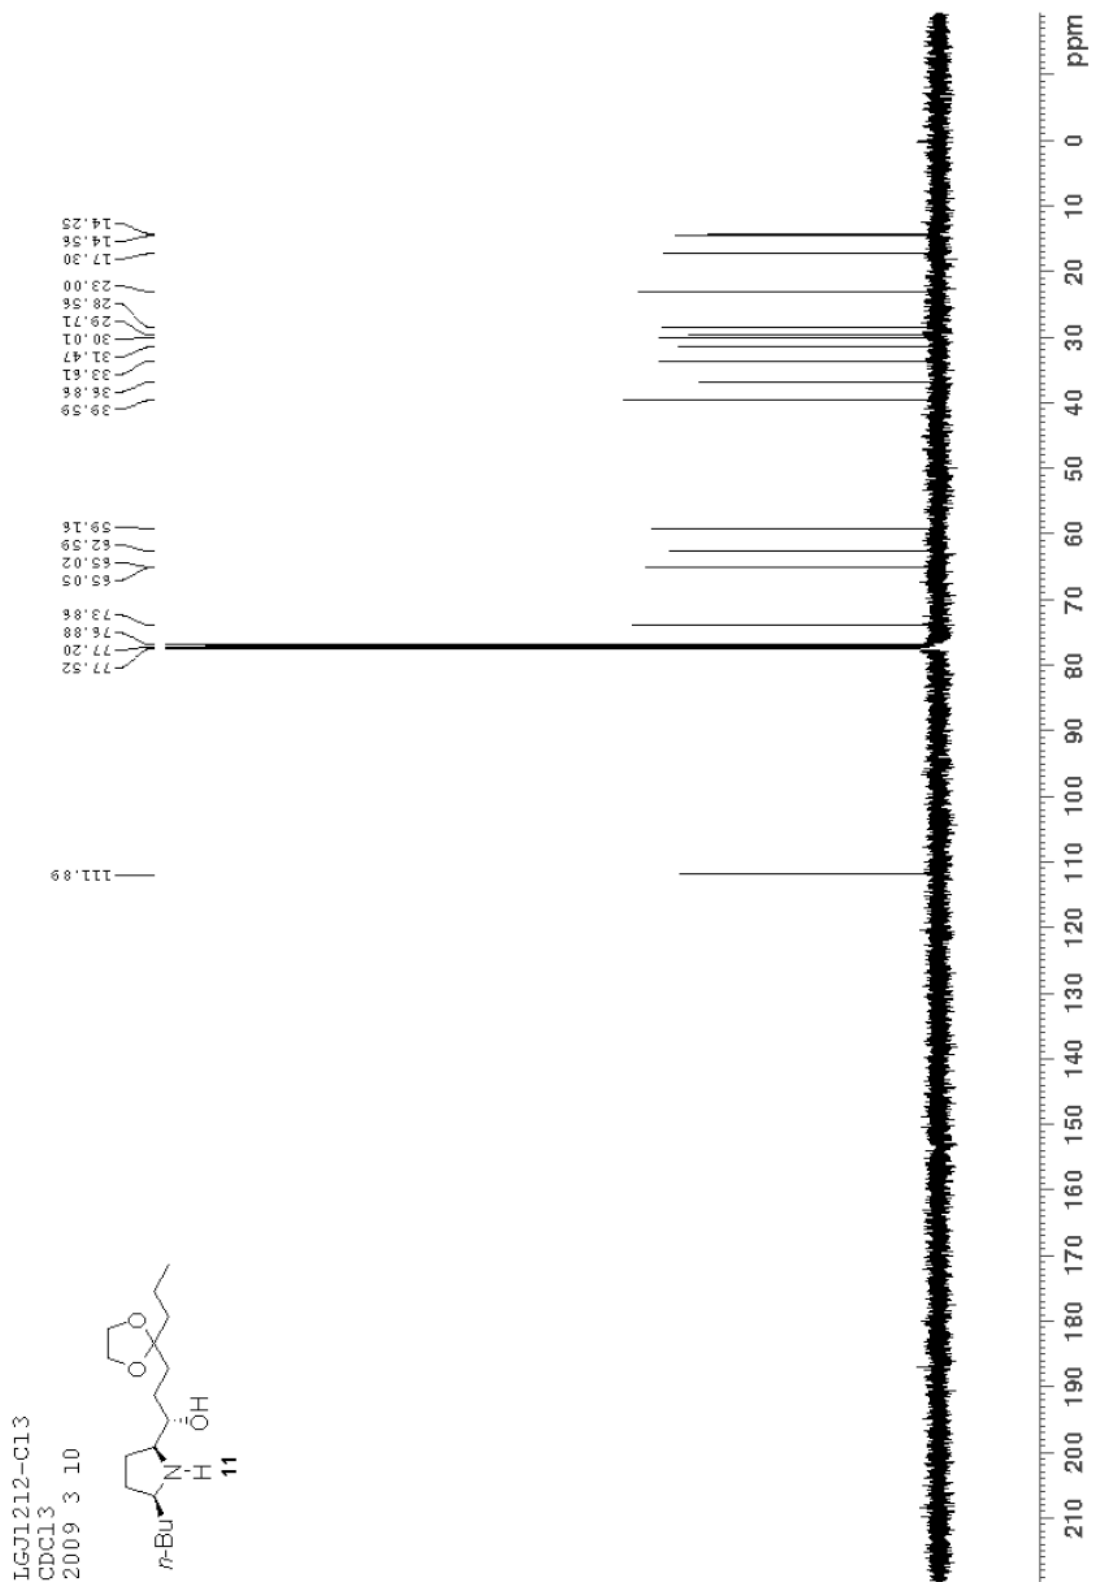



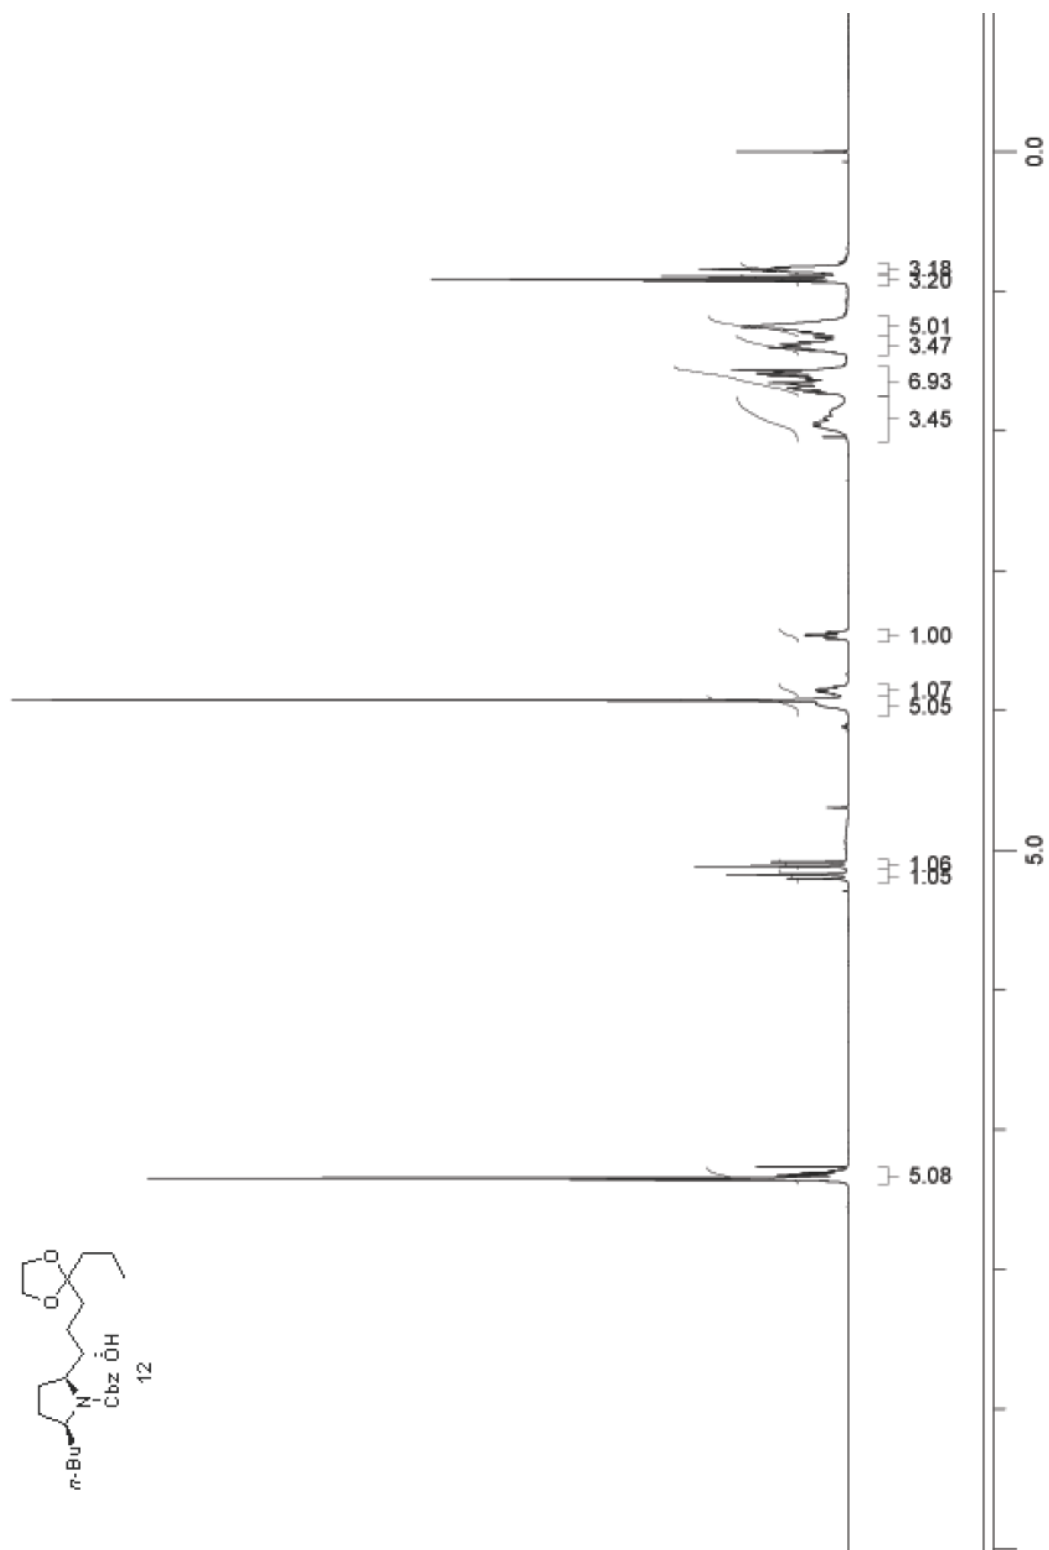

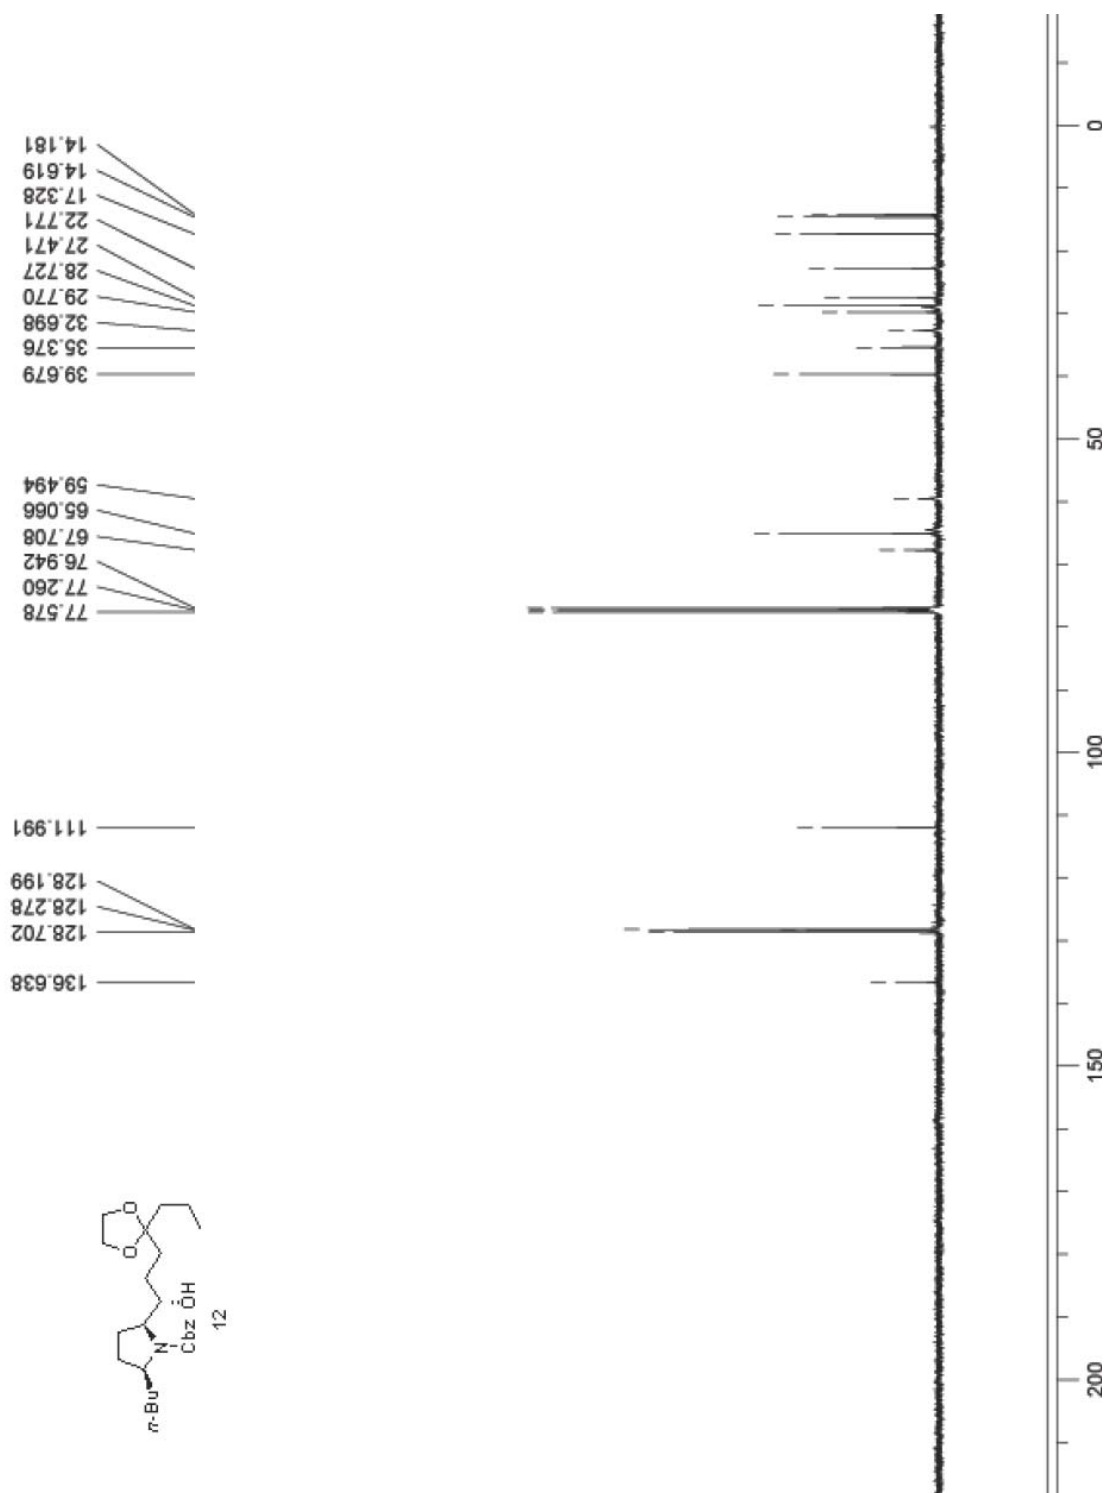

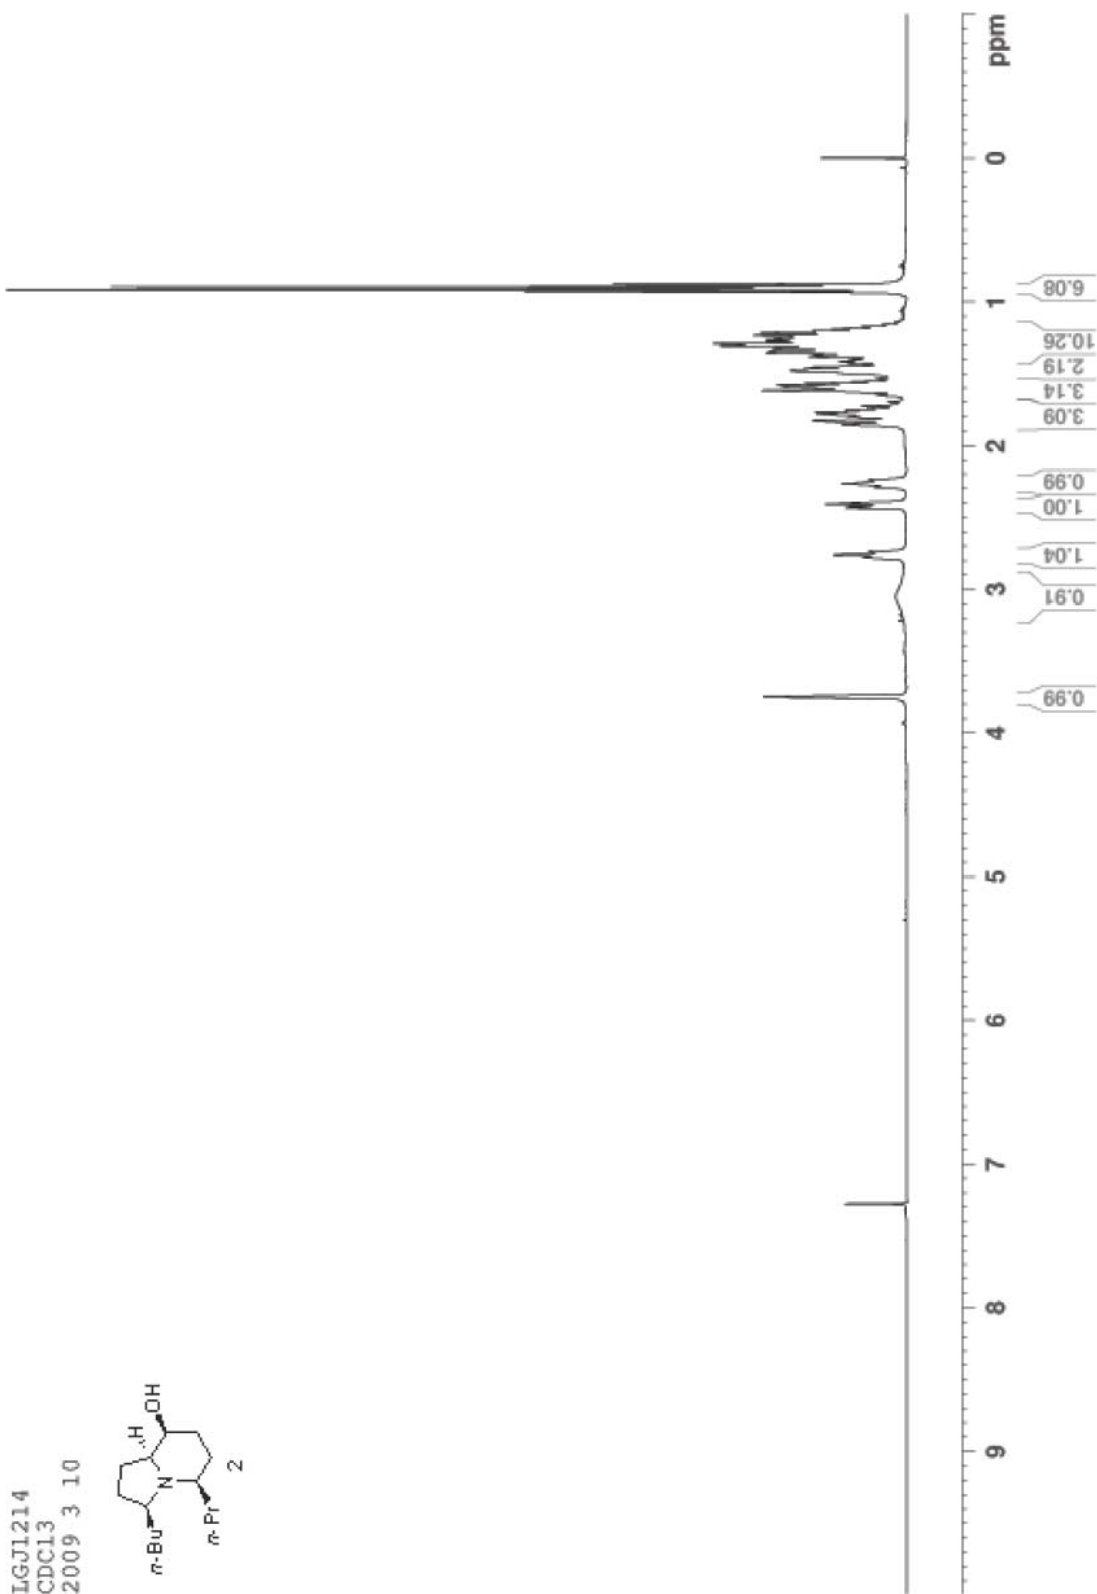

LGJ1214-Cl3  
CDCl3  
2009 3 10

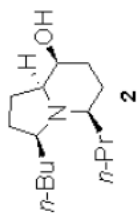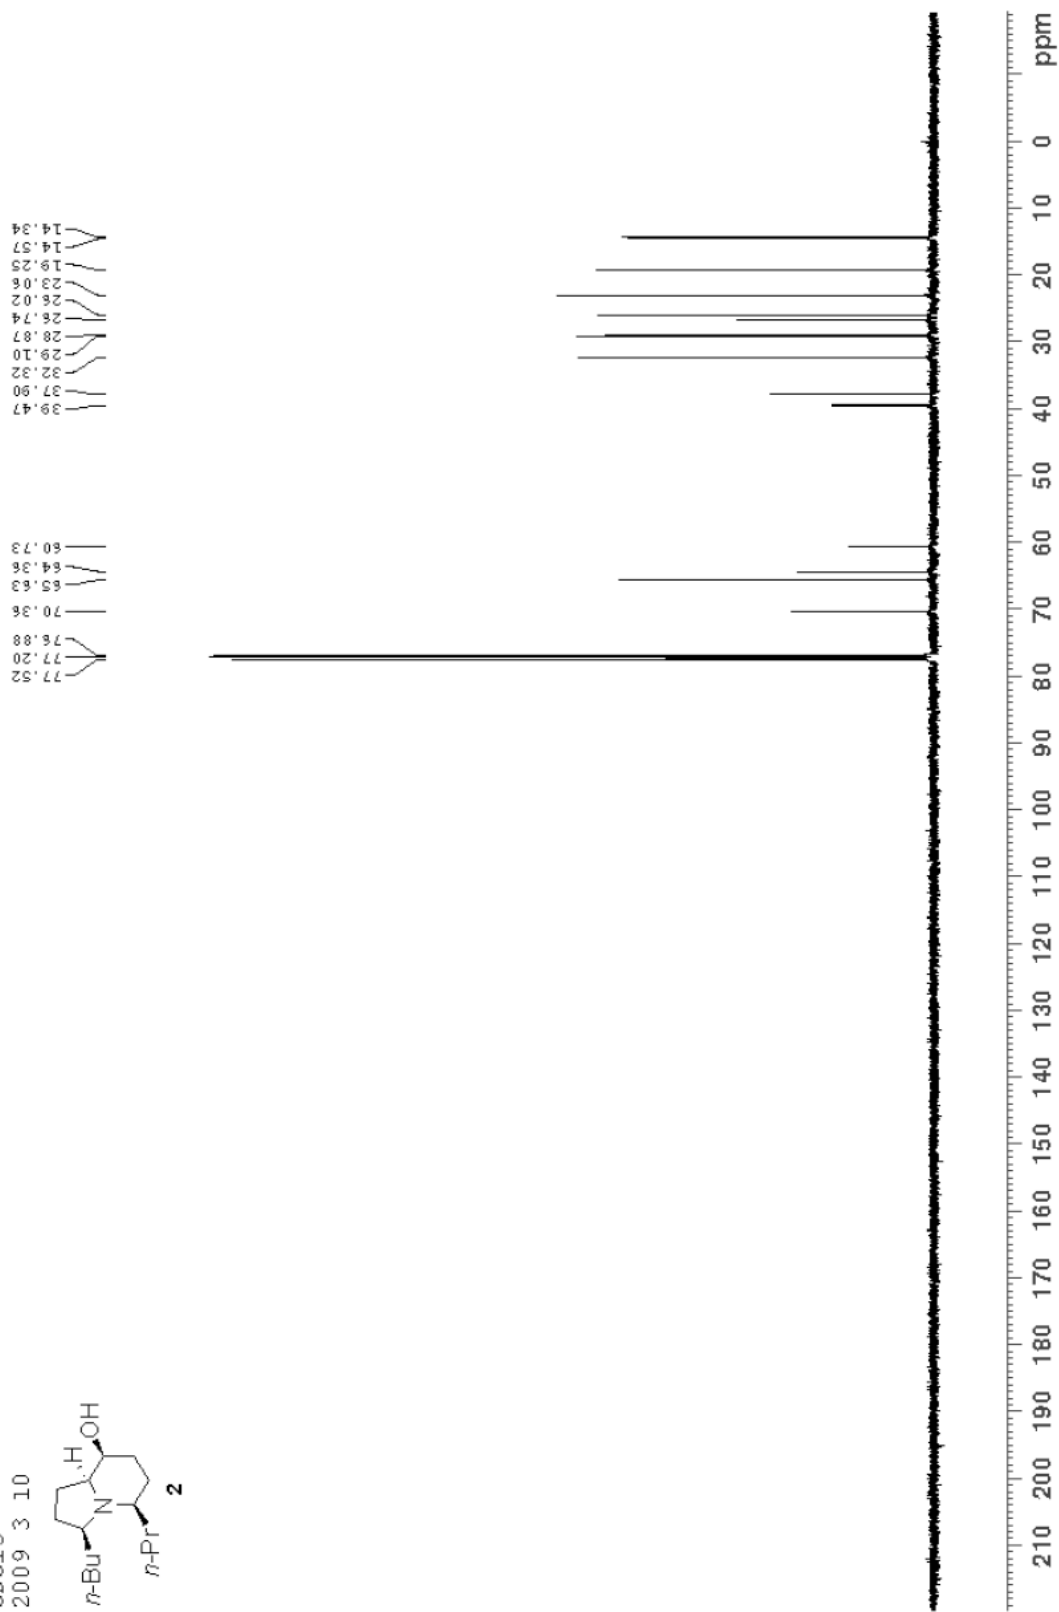

Table 1. Comparison of the NMR data between our synthetic product **2** and those reported.

| $\delta_{\text{H}}$ (our synthetic product)       | $\delta_{\text{H}}$ (Toyooka's synthetic product) <sup>1</sup> | $\delta_{\text{C}}$ (our product) | $\delta_{\text{C}}$ (Toyooka's product) <sup>1</sup> |
|---------------------------------------------------|----------------------------------------------------------------|-----------------------------------|------------------------------------------------------|
| 0.90 (3H, t, $J = 7.2$ Hz)                        | 0.90 (3H, t, $J = 7.2$ Hz)                                     | 14.3                              | 14.3                                                 |
| 0.92 (3H, t, $J = 7.3$ Hz)                        | 0.91 (3H, t, $J = 7.2$ Hz)                                     | 14.6                              | 14.5                                                 |
| 1.14-1.53 (12H, br m)                             | 1.17-1.49 (11H, brm)                                           | 19.3                              | 19.2                                                 |
| 1.54-1.66 (3H, m)                                 | 1.53-1.62 (4H, m)                                              | 23.1                              | 23.0                                                 |
| 1.68-1.88 (3H, m)                                 | 1.68-1.86 (3H, m)                                              | 26.0                              | 25.9                                                 |
| 2.27 (1H, apparent t, $J = 9.7$ Hz) (NCH)         | 2.25 (1H, t-like, $J = 9.8$ Hz)                                | 26.7                              | 26.7                                                 |
| 2.42 (1H, dd, $J = 4.5, 10.7$ Hz) (NCH)           | 2.40 (1H, m)                                                   | 28.9                              | 28.8                                                 |
| 2.76 (1H, apparent t, $J = 8.1$ Hz) (NCH)         | 2.75 (1H, t-like, $J = 8.5$ Hz)                                | 29.1                              | 29.0                                                 |
| 3.05 (1H, br, D <sub>2</sub> O exchangeable) (OH) | 3.03 (1H, d, $J = 10.3$ Hz)                                    | 32.3                              | 32.2                                                 |
| 3.75 (1H, br) (CHOH)                              | 3.74 (1H, d, $J = 9.8$ Hz)                                     | 37.9                              | 37.8                                                 |
|                                                   |                                                                | 39.5                              | 39.4                                                 |
|                                                   |                                                                | 60.7                              | 60.4                                                 |
|                                                   |                                                                | 64.4                              | 64.1                                                 |
|                                                   |                                                                | 65.6                              | 65.5                                                 |
|                                                   |                                                                | 70.4                              | 70.1                                                 |

Reference:

1. N. Toyooka, D. J. Zhou, H. Nemoto, Y. Tezuka, S. Kadota, T. H. Jones, H. M. Garraffo, T. F. Spande and J. W. Daly, *Synlett*, 2008, 1894-1896.
